1 **Impact of Daily Weather on COVID-19 outbreak in India**

2 Amitesh Gupta<sup>1\*</sup>, Biswajeet Pradhan<sup>2,3</sup>

3 Email: [amitesh13gupta14@gmail.com](mailto:amitesh13gupta14@gmail.com), [Biswajeet.Pradhan@uts.edu.au](mailto:Biswajeet.Pradhan@uts.edu.au)

4 <sup>1</sup>Remote Sensing and GIS Department, JIS University, Agarpara, Kolkata, India.

5 <sup>2</sup>Centre for Advanced Modelling and Geospatial Information Systems (CAMGIS), Faculty of  
6 Engineering & IT, University of Technology Sydney, Australia

7 <sup>3</sup>Department of Energy and Mineral Resources Engineering, Sejong University, Choongmu-  
8 gwan, 209 Neungdong-ro, Gwangjin-gu, Seoul 05006, Korea

9

10 **\*For Correspondence**

11 Email: [amitesh13gupta14@gmail.com](mailto:amitesh13gupta14@gmail.com)

12 Mobile: +91 72781 42538

13

14

15

16

17

18

19

20

21 **Abstract**

22 The COVID-19 pandemic has outspread obstreperously in India. As of June 04, 2020, more  
23 than 2 lakh cases have been confirmed with a death rate of 2.81%. It has been noticed that,  
24 out of each 1000 tests, 53 result positively infected. In order to investigate the impact of  
25 weather conditions on daily transmission occurring in India, daily data of Maximum ( $T_{Max}$ ),  
26 Minimum ( $T_{Min}$ ), Mean ( $T_{Mean}$ ) and Dew Point Temperature ( $T_{Dew}$ ), Diurnal Temperature  
27 range ( $T_{Range}$ ), Average Relative Humidity, Range in Relative Humidity, and Wind Speed  
28 ( $WS$ ) over 9 most affected cities are analysed in several time frames: weather of that day, 7,  
29 10, 12, 14, 16 days before transmission. Spearman's rank correlation ( $r$ ) shows significant but  
30 low correlation with most of the weather parameters, however, comparatively better  
31 association exists on 14 days lag. Diurnal range in Temperature and Relative Humidity shows  
32 non-significant correlation. Analysis shows, COVID-19 cases likely to be increased with  
33 increasing air temperature, however role of humidity is not clear. Among weather parameters,  
34 Minimum Temperature was relatively better correlate than other. 80% of the total confirmed  
35 cases were registered when  $T_{Max}$ ,  $T_{Mean}$ ,  $T_{Min}$ ,  $T_{Range}$ ,  $T_{Dew}$ , and  $WS$  on 12-16 days ago vary  
36 within a range of 33.6-41.3° C, 29.8-36.5° C, 24.8-30.4° C, 7.5-15.2° C, 18.7-23.6° C, and  
37 4.2-5.75 m/s respectively, hence, it gives an idea of susceptible weather conditions for such  
38 transmission in India. Using Support Vector Machine based regression, the daily cases are  
39 profoundly estimated with more than 80% accuracy, which indicate that coronavirus  
40 transmission can't be well linearly correlated with any single weather parameters, rather  
41 multivariate non-linear approach must be employed. Accounting lag of 12-16 days, the  
42 association found to be excellent, thus depict that there is an incubation period of  $14 \pm 02$   
43 days for coronavirus transmission in Indian scenario.

44 **Keywords:**

45 COVID-19; pandemic; weather; India

## 46 **1. Introduction**

47 In human history, it is apparent that pathogens have caused devastating consequences in  
48 social wellbeing and economy (Briz-Redón and Serrano-Aroca, 2020). The recent novel  
49 coronavirus disease (COVID-19) is one of the prominent example of such a disastrous event  
50 that has grasped the world. The earliest outbreak of COVID-19 caused by Severe Acute  
51 Respiratory Syndrome CoronaVirus-2 (SARS-CoV-2) happened in Wuhan, Hubei Province,  
52 China during the late December, 2019, (Guan et al., 2020b; Wu and McGoogan, 2020; Zhu et  
53 al., 2020; Zu et al., 2020). Because of human-to-human transmissibility of the virus (Wang et  
54 al., 2020a; 2020b), the circumstances become progressively unpredictable and vulnerable in  
55 terms of transmission of this disease. Considering the rapid turnaround, the World Health  
56 Organization (WHO) declared an international public health emergency on January 30, 2020,  
57 and later on March 11, 2020, WHO declared this disease as global pandemic due to speedy  
58 blowout of infections. Till June 04, 2020, a total of 6,709,724 cases have been affirmed with  
59 5.85% deaths worldwide (<https://www.worldometers.info/coronavirus>). Despite the fact India  
60 has registered its first case on January 29, 2020, the outbreak occurred March 2, 2020  
61 onwards and as of June 04, 2020, a total of 226,722 cases have been confirmed; however, the  
62 death rate (2.81%) is quite lower than the worldwide situation.

63 Clinical investigations on COVID-19 identified respiratory droplets as the most common  
64 agent of this infection (Ge et al., 2013; Huang et al., 2020). The reported symptoms are also  
65 quite analogous to the other coronavirus diseases such as MERS and SARS, e.g. moderate to  
66 high fever with dry cough, and difficulty in breathing attributable to respiratory disorder in  
67 early stage, while it causes kidney failure, pneumonia in severe phase (Holshue et al., 2020;  
68 Perlman, 2020; Tan et al., 2005; Wang et al., 2020c).

69 Environmental factors, such as daily weather and long term climatic conditions may affect  
70 the epidemiological dynamics of this type of infectious disease (Dalziel et al., 2018; Yuan et  
71 al., 2006). Daily air temperature and relative humidity may impact on the transmissions of  
72 coronavirus by affecting the persistence of the viral infections within its transmission routes  
73 (Casanova et al., 2010). A few studies accounting climate and weather conditions found that  
74 these factors considerably affect the spatial distribution along with its incubation period  
75 (Bedford et al., 2015; Lemaitre et al., 2019; Sooryanarain and Elankumaran, 2015). At the  
76 earliest, Bull (1980) reported that the mortality rate of pneumonia is profoundly associated  
77 with the changes in weather condition. Studies have revealed that among different climatic  
78 variables the air temperature affects the influenza epidemics mostly in tropical regions  
79 (Tamerius et al., 2013) whereas the mid-latitudinal temperate regions experience the  
80 influenza diseases epidemics mostly during winter months (Bedford et al., 2015;  
81 Sooryanarain and Elankumaran, 2015). Nevertheless, the response to weather pattern on  
82 COVID-19 transmission found quite debatable, since, the studies carried out in different  
83 countries in the world suggested an existing correlation between weather and COVID-19  
84 pandemic likewise that it occurs with other influenza infections (Ficetola and Rubolini, 2020;  
85 Liu et al., 2020; Ma et al., 2020; Oliveiros et al., 2020; Qi et al., 2020; Tosepu et al., 2020).  
86 Contradictorily, few studies have reported that meteorological observations are not correlated  
87 with outbreak pattern (Jamil et al., 2020; Mollalo et al., 2020; Shi et al., 2020; Xie and Zhu,  
88 2020). Studies carried out by Wang et al., 2020a; Wang et al., 2020b suggested that the  
89 spread of disease supposed to be decreased with an increase in temperature. Gupta et al.  
90 (2020a) also predicted lowering of transmission in warmer conditions in India. However, in  
91 view of the long term climate record, Gupta et al., 2020b found, comparatively hot areas in  
92 India are possibly going to be more affected by this disease. Besides, the incubation period of  
93 COVID-19 also may vary spatially. The WHO reported an incubation period of 2-10 days for

94 COVID-19 based on worldwide observation (Novel Coronavirus(2019-nCoV) Situation  
95 Report - 7, 2020) while the National Health Commission in China had initially estimated an  
96 incubation period of 10-14 days for China ([https://www.aljazeera.com/news/2020/01/chinas-  
97 national-health-commission-news-conference-coronavirus-200126105935024.html](https://www.aljazeera.com/news/2020/01/chinas-national-health-commission-news-conference-coronavirus-200126105935024.html)) and the  
98 Centres for Disease Control and Prevention in United States of America estimate this  
99 incubation period of 2-14 days ([https://www.cdc.gov/coronavirus/2019-ncov/symptoms-  
100 testing/symptoms.html](https://www.cdc.gov/coronavirus/2019-ncov/symptoms-testing/symptoms.html)). On other hand, Bai et al., 2020; Guan et al., 2020a reported  
101 incubation period of around 20days. Since no such study has investigated the impact of daily  
102 weather on COVID-19 transmission in Indian context as well as the incubation period of this  
103 disease in India is not mentioned anywhere to date, there is a need of comprehensive study  
104 for Indian scenario. Thus, the present study is aimed to understand the trends, abrupt changes  
105 and influence of daily weather conditions in COVID-19 transmission in India. We have also  
106 investigated the incubation period of this disease based on five timeframes, specifically on  
107 the day of the case, within 7, 10, 12, 14, and 16 days of the case.

## 108 **2. Data and Methodology**

### 109 *2.1 Data collection*

110 India, the largest country in South Asia, extended from 6° N to 38° N and 68° E to 98° E,  
111 comprising a land area of 3.287 million sq. km. with a total population of more than 1.2  
112 billion (Census, 2011). The data of daily COVID-19 cases were collected from the official  
113 website of the Ministry of Health of India (<https://www.mohfw.gov.in>). Among 725 districts  
114 in India, more than 85% has reported multiple confirmed cases. Several studies have reported  
115 that the disease spread at a higher rate in the cities where population is very high (Ahmadi et  
116 al., 2020; Bonasera and Zhang, 2020; Casanova et al., 2010; Kang et al., 2020; Rocklöv and  
117 Sjödin, 2020). Thus, among 53 ‘million cities’ (where the total population is more than one  
118 million) in India, 9 cities have been selected for this study (Fig. 1), from where more than

119 79% of total cases in India have been reported till June 4, 2020. The trend of confirmed cases  
120 over those cities along with comparison of trend of daily transmission in entire country is  
121 highly increasing (Fig. 2). The weather data were collected from  
122 <https://www.wunderground.com>. Fig. 3 shows the prevailing weather conditions in terms of  
123 Maximum, Minimum and Mean Temperature, Diurnal Range in Temperature, Dew Point  
124 Temperature, Average Relative Humidity, Diurnal Range in Relative Humidity and Wind  
125 Speed in those cities. It exhibits that there were variations in weather conditions in different  
126 cities, hence, this study will signify how spatially varying weather conditions influence the  
127 pattern of COVID-19 transmission in India.

## 128 *2.2 Spearman's correlation test*

129 Spearman's rank correlation coefficient ( $r_s$ ) is implemented to define the association between  
130 a number of daily new cases and weather parameters. It summarizes how well the association  
131 between daily transmission and weather parameters can be demarcated. The coefficient can  
132 be calculated via the following equation –

$$133 \quad r_s = 1 - 6 \frac{\sum d_i^2}{n(n^2-1)} \quad (9)$$

134 where,  $n$  represents the number of alternatives, and  $d_i$  is the difference between the ranks of  
135 two parameters.

## 136 *2.3 Support Vector Machine*

137 Support Vector Machine (SVM) is an extensively utilized machine learning technique. It is  
138 performed on the basis of statistical auto-adaptation and structural risk minimization principle  
139 (Tien Bui et al., 2012). By creating hyper-plane, the nonlinearity in the input dataset is  
140 reshaped into the linearity (Jebur et al., 2014). Here, kernel function is the key factor behind  
141 this data transformation. Using the assigned training dataset, SVM put the original input into

142 a higher dimensional feature space, then finds the supreme fringe of separation among the  
143 observations and constructs a hyper-plane at the centre of that extreme margin (Marjanović et  
144 al., 2011). Support vectors are nothing but the nearest training points to the produced hyper  
145 plane. Thus, this model adapt itself by input observations and create hyper-plane and identify  
146 the support vectors and thereafter acted on the input variables of testing dataset to estimate  
147 the predicted variable. Further insights about the mathematical computations and procedures  
148 work in SVM can be found in several literature such as Pradhan, 2013; Tehrany et al., 2015,  
149 2014; Tien Bui et al., 2012. However, the accuracy of estimation depends on the kernel type  
150 selected during the training of the model (Yao et al., 2008). The Radial basis function (RBF)  
151 kernel produce preferred exactness than linear, polynomial and sigmoid kernels due to its  
152 higher capability in interpolation (Song et al., 2011).

153 Early observation by Gupta et al. (2020c) noted that transmission in India is likely to be  
154 higher over those area which are located in lower altitudes and having higher population.  
155 Thus, we also incorporate elevation and population of those selected cities along with the  
156 daily weather and estimate the log-transformed value of daily COVID-19 cases (Eq. 10).

$$157 \ln(NC) = T_{Max} + T_{Min} + T_{Mean} + T_{range} + T_{Dew} + H_{Avg} + H_{range} + WS + Ele + Pop$$

158 (10)

159 where,  $NC$  is the number of New Confirmed Case,  $T_{Max}$  is Maximum Air Temperature ( $^{\circ}C$ ),  
160  $T_{Min}$  is Minimum Air Temperature ( $^{\circ}C$ ),  $T_{Mean}$  is Mean Air Temperature ( $^{\circ}C$ ),  $T_{range}$  is  
161 Temperature Range ( $^{\circ}C$ ),  $T_{Dew}$  is Dew point Temperature ( $^{\circ}C$ ),  $H_{Avg}$  is Average Relative  
162 Humidity (%),  $H_{Range}$  is Range of Relative Humidity (%),  $WS$  is Wind Speed,  $Ele$  is Elevation  
163 (m),  $Pop$  is total Population.

164 70% of the total observation was used as training dataset and rest used for testing. The  
165 accuracy of estimation was evaluated in terms of  $R^2$ , Root Mean Square Error (RMSE) and  
166 Mean Bias (MB).

### 167 3. Results and discussion

168 The Spearman's correlation analysis (Table 1) shows that there were mostly significant but  
169 considerably low correlation lies between the number of daily new case and weather  
170 condition. Among weather parameters, only  $T_{range}$  and  $H_{range}$  are negatively correlated with  
171 the daily transmission, however, correlation for  $T_{range}$  is non-significant in all time span.  
172 Hence, the diurnal range of temperature is not significantly associated with COVID-19  
173 transmission in India.  $H_{avg}$  is significant on the day of transmission up to 10 days ago of  
174 transmission, while  $H_{range}$  is significant 12-16 days ago of transmission; it suggest that the  
175 role of humidity is quite complex and needed to be investigated further in depth. On other  
176 hand, the analysis indicate that the  $T_{max}$ ,  $T_{min}$ ,  $T_{mean}$ ,  $T_{Dew}$  on the day of the transmission has  
177 the lowest correlation and it improves at its best with a time lag of 14 days. In other words,  
178 the maximum, minimum, mean and dew point temperature on 14 days ago of transmission is  
179 closely related with a number of infections. Interestingly,  $T_{min}$  is found better related than  
180  $T_{mean}$   $T_{max}$   $T_{Dew}$ . Therefore, places with higher minimum temperature are more susceptible for  
181 COVID-19 transmission in India. WS also found to be positively correlated with daily  
182 transmission, which may infer that virus might be able to transmigrate with high wind. Since,  
183 most of the weather parameters including WS, are better correlate with the daily confirmed  
184 cases with a time lag of 14 days, it indicate an approximate incubation period of around 14  
185 days for this disease in the Indian scenario.

186 Fig. 4 shows the validation of estimated daily confirmed cases for all time spans using non-  
187 linear multivariate Support Vector Regression Model with RBF kernel. The model



188 performance in terms of  $R^2$ , RMSE, MB are represented in Table 2. It depicts that SVM  
189 based regression model is very efficient to establish the complex relationship among different  
190 weather parameters with the daily transmission of COVID-19, however, it exhibits an  
191 underestimation for very high values ( $>1200$  cases). Hence, it make us understood that any  
192 single weather parameter is not enough to linearly correlate the daily transmission, rather than  
193 that, the non-linear multivariate approach is efficient to estimate the daily transmission in  
194 India with high accuracy. Correlation analysis has evidently stipulated a relatively higher  
195 degree of association for daily new cases with most of the parameters only when the time lag  
196 of 14 days is taken in to consideration. The SVM based regression model also performs  
197 remarkably well with a time lag of more than 12 days. These together suggest a conspicuous  
198 incubation period of 12-16 ( $14 \pm 02$ ) days for this transmission in India. In order to better  
199 understand the influence of varying weather conditions, the response curve of significant  
200 parameters to cumulative confirmed cases was framed (Fig. 5), which reveal that there is an  
201 acute range in weather parameters for which the transmission is highly susceptible. 80% of  
202 the total confirmed cases were registered when  $T_{Max}$ ,  $T_{Mean}$ ,  $T_{Min}$ ,  $T_{Range}$ ,  $T_{Dew}$ , and  $WS$  on 12-  
203 16 days ago vary within a range of  $33.6-41.3^\circ C$ ,  $29.8-36.5^\circ C$ ,  $24.8-30.4^\circ C$ ,  $7.5-15.2^\circ C$ ,  
204  $18.7-23.6^\circ C$ , and  $4.2-5.75$  m/s respectively. Hence, it gives an idea of susceptible weather  
205 conditions for such transmission in India. In other words, the areas experiencing such weather  
206 pattern in India must have been affected by this disease.

#### 207 **4. Conclusion**

208 Unlike most of the studies, the present study investigated the impact of daily maximum,  
209 minimum, mean, and dew point temperature, temperature range, average humidity, humidity  
210 range and wind speed on that day, as well as within 7, 10, 12, 14, and 16 days of the  
211 confirmed cases of COVID-19 in the Indian context. The analysis revealed that the count of  
212 confirmed cases significantly correlated with a certain range of weather conditions. Thus,

213 instead of linear correlation, SVM based regression approach efficaciously resolve this  
214 complex association and able to estimate daily cases of transmission using the weather inputs.  
215 However, the positive correlation between daily transmission and air temperature as well as  
216 wind speed designates that the daily transmission in highly populated areas in India has been  
217 responsively increased during current summer days. A prominent incubation period of  $14 \pm$   
218 02 days has also been identified, which was a little higher than what WHO had prescribed  
219 early in March. Therefore, in the prevailing weather conditions in India, the SARS-CoV-2  
220 can be disseminated into the surrounding environment for around two weeks after being  
221 grievd from any other contaminant. This study had faced several limitations since many  
222 other major affected cities were not able to incorporate due to lack of data availability.  
223 Besides, the count of immigrants from abroad or other cities and have been quarantined were  
224 not available; these might can enhance the exactitude of the current analysis.

225

#### 226 **CRedit authorship contribution statement**

227 **Amitesh Gupta:** Conceptualization, Methodology, Investigation, Visualization, Writing –  
228 original draft. **Biswajeet Pradhan:** Writing – review and editing, Supervision.

229

#### 230 **Acknowledgement**

231 This research had not any funding support. Mr. Sumit Das is highly acknowledged for his  
232 continuous supports and substantial editing to improve the quality of paper and proof reading.  
233 Dr. Arkadeb Ghosh is also acknowledged for his kind help during the work.

234

235

236

237 **References**

- 238 Ahmad, I., Tang, D., Wang, T., Wang, M., Wagan, B., 2015. Precipitation Trends over Time  
239 Using Mann-Kendall and Spearman's rho Tests in Swat River Basin, Pakistan.  
240 Advances in Meteorology 2015, 1–15. <https://doi.org/10.1155/2015/431860>
- 241 Ahmadi, M., Sharifi, A., Dorosti, S., Jafarzadeh Ghouschi, S., Ghanbari, N., 2020.  
242 Investigation of effective climatology parameters on COVID-19 outbreak in Iran.  
243 Science of The Total Environment 729, 138705.  
244 <https://doi.org/10.1016/j.scitotenv.2020.138705>
- 245 Bai, Y., Yao, L., Wei, T., Tian, F., Jin, D.-Y., Chen, L., Wang, M., 2020. Presumed  
246 Asymptomatic Carrier Transmission of COVID-19. JAMA 323, 1406–1407.  
247 <https://doi.org/10.1001/jama.2020.2565>
- 248 Bedford, T., Riley, S., Barr, I.G., Broor, S., Chadha, M., Cox, N.J., Daniels, R.S.,  
249 Gunasekaran, C.P., Hurt, A.C., Kelso, A., Klimov, A., Lewis, N.S., Li, X., McCauley,  
250 J.W., Odagiri, T., Potdar, V., Rambaut, A., Shu, Y., Skepner, E., Smith, D.J., Suchard,  
251 M.A., Tashiro, M., Wang, D., Xu, X., Lemey, P., Russell, C.A., 2015. Global  
252 circulation patterns of seasonal influenza viruses vary with antigenic drift. Nature  
253 523, 217–220. <https://doi.org/10.1038/nature14460>
- 254 Bonasera, A., Zhang, S., 2020. Chaos, Percolation and the Coronavirus Spread. Front. Phys.  
255 8. <https://doi.org/10.3389/fphy.2020.00171>
- 256 Briz-Redón, Á., Serrano-Aroca, Á., 2020. A spatio-temporal analysis for exploring the effect  
257 of temperature on COVID-19 early evolution in Spain. Science of The Total  
258 Environment 728, 138811. <https://doi.org/10.1016/j.scitotenv.2020.138811>
- 259 Bull, G.M., 1980. The Weather And Deaths From Pneumonia. The Lancet 315, 1405–1408.  
260 <https://doi.org/10.5555/uri:pii:S0140673680926665>

- 261 Casanova, L.M., Jeon, S., Rutala, W.A., Weber, D.J., Sobsey, M.D., 2010. Effects of air  
262 temperature and relative humidity on coronavirus survival on surfaces. *Appl. Environ.*  
263 *Microbiol.* 76, 2712–2717. <https://doi.org/10.1128/AEM.02291-09>
- 264 Collaud Coen, M., Andrews, E., Asmi, A., Baltensperger, U., Bukowiecki, N., Day, D.,  
265 Fiebig, M., Fjaeraa, A.M., Flentje, H., Hyvärinen, A., Jefferson, A., Jennings, S.G.,  
266 Kouvarakis, G., Lihavainen, H., Lund Myhre, C., Malm, W.C., Mihapopoulos, N.,  
267 Molenaar, J.V., O’Dowd, C., Ogren, J.A., Schichtel, B.A., Sheridan, P.,  
268 Virkkula, A., Weingartner, E., Weller, R., Laj, P., 2013. Aerosol decadal trends – Part  
269 1: In-situ optical measurements at GAW and IMPROVE stations. *Atmos. Chem.*  
270 *Phys.* 13, 869–894. <https://doi.org/10.5194/acp-13-869-2013>
- 271 Dalziel, B.D., Kissler, S., Gog, J.R., Viboud, C., Bjørnstad, O.N., Metcalf, C.J.E., Grenfell,  
272 B.T., 2018. Urbanization and humidity shape the intensity of influenza epidemics in  
273 U.S. cities. *Science* 362, 75–79. <https://doi.org/10.1126/science.aat6030>
- 274 Ficitola, G.F., Rubolini, D., 2020. Climate affects global patterns of COVID-19 early  
275 outbreak dynamics. medRxiv 2020.03.23.20040501.  
276 <https://doi.org/10.1101/2020.03.23.20040501>
- 277 Gao, P., Mu, X.-M., Wang, F., Li, R., 2011. Changes in streamflow and sediment discharge  
278 and the response to human activities in the middle reaches of the Yellow River.  
279 *Hydrology and Earth System Sciences* 15, 1–10. [https://doi.org/10.5194/hess-15-1-](https://doi.org/10.5194/hess-15-1-2011)  
280 2011
- 281 Gatto, M., Bertuzzo, E., Mari, L., Miccoli, S., Carraro, L., Casagrandi, R., Rinaldo, A., 2020.  
282 Spread and dynamics of the COVID-19 epidemic in Italy: Effects of emergency  
283 containment measures. *PNAS* 117, 10484–10491.  
284 <https://doi.org/10.1073/pnas.2004978117>

- 285 Ge, X.-Y., Li, J.-L., Yang, X.-L., Chmura, A.A., Zhu, G., Epstein, J.H., Mazet, J.K., Hu, B.,  
286 Zhang, W., Peng, C., Zhang, Y.-J., Luo, C.-M., Tan, B., Wang, N., Zhu, Y., Cramer,  
287 G., Zhang, S.-Y., Wang, L.-F., Daszak, P., Shi, Z.-L., 2013. Isolation and  
288 characterization of a bat SARS-like coronavirus that uses the ACE2 receptor. *Nature*  
289 503, 535–538. <https://doi.org/10.1038/nature12711>
- 290 Gocic, M., Trajkovic, S., 2013. Analysis of changes in meteorological variables using Mann-  
291 Kendall and Sen's slope estimator statistical tests in Serbia. *Global and Planetary*  
292 *Change* 100, 172–182. <https://doi.org/10.1016/j.gloplacha.2012.10.014>
- 293 Guan, W., Ni, Z., Hu, Yu, Liang, W., Ou, C., He, J., Liu, L., Shan, H., Lei, C., Hui, D.S., Du,  
294 B., Li, L., Zeng, G., Yuen, K.-Y., Chen, R., Tang, C., Wang, T., Chen, P., Xiang, J.,  
295 Li, S., Wang, Jin-lin, Liang, Z., Peng, Y., Wei, L., Liu, Y., Hu, Ya-hua, Peng, P.,  
296 Wang, Jian-ming, Liu, J., Chen, Z., Li, G., Zheng, Z., Qiu, S., Luo, J., Ye, C., Zhu, S.,  
297 Zhong, N., 2020a. Clinical characteristics of 2019 novel coronavirus infection in  
298 China. *medRxiv* 2020.02.06.20020974. <https://doi.org/10.1101/2020.02.06.20020974>
- 299 Guan, W., Ni, Z., Hu, Yu, Liang, W., Ou, C., He, J., Liu, L., Shan, H., Lei, C., Hui, D.S.C.,  
300 Du, B., Li, L., Zeng, G., Yuen, K.-Y., Chen, R., Tang, C., Wang, T., Chen, P., Xiang,  
301 J., Li, S., Wang, Jin-lin, Liang, Z., Peng, Y., Wei, L., Liu, Y., Hu, Ya-hua, Peng, P.,  
302 Wang, Jian-ming, Liu, J., Chen, Z., Li, G., Zheng, Z., Qiu, S., Luo, J., Ye, C., Zhu, S.,  
303 Zhong, N., 2020b. Clinical Characteristics of Coronavirus Disease 2019 in China. *N*  
304 *Engl J Med* 382, 1708–1720. <https://doi.org/10.1056/NEJMoa2002032>
- 305 Güçlü, Y.S., 2018. Multiple Şen-innovative trend analyses and partial Mann-Kendall test.  
306 *Journal of Hydrology* 566, 685–704. <https://doi.org/10.1016/j.jhydrol.2018.09.034>
- 307 Gupta, A., Banerjee, S., Das, S., 2020b. Significance of geographical factors (climatic,  
308 topographic and social) to the COVID-19 outbreak in India. *OSF Preprints*.  
309 <https://doi.org/10.31219/osf.io/9gqpm>

- 310 Gupta, A., Banerjee, S., Das, S., 2020c. Significance of geographical factors to the COVID-  
311 19 outbreak in India. *Modeling Earth Systems and Environment*.  
312 <https://doi.org/10.1007/s40808-020-00838-2>
- 313 Gupta, S., Raghuwanshi, G.S., Chanda, A., 2020a. Effect of weather on COVID-19 spread in  
314 the US: A prediction model for India in 2020. *Science of The Total Environment* 728,  
315 138860. <https://doi.org/10.1016/j.scitotenv.2020.138860>
- 316 Hänsel, S., Medeiros, D.M., Matschullat, J., Petta, R.A., de Mendonça Silva, I., 2016.  
317 Assessing Homogeneity and Climate Variability of Temperature and Precipitation  
318 Series in the Capitals of North-Eastern Brazil. *Front. Earth Sci.* 4.  
319 <https://doi.org/10.3389/feart.2016.00029>
- 320 Holshue, M.L., DeBolt, C., Lindquist, S., Lofy, K.H., Wiesman, J., Bruce, H., Spitters, C.,  
321 Ericson, K., Wilkerson, S., Tural, A., Diaz, G., Cohn, A., Fox, L., Patel, A., Gerber,  
322 S.I., Kim, L., Tong, S., Lu, X., Lindstrom, S., Pallansch, M.A., Weldon, W.C., Biggs,  
323 H.M., Uyeki, T.M., Pillai, S.K., 2020. First Case of 2019 Novel Coronavirus in the  
324 United States. *New England Journal of Medicine* 382, 929–936.  
325 <https://doi.org/10.1056/NEJMoa2001191>
- 326 Huang, C., Wang, Y., Li, X., Ren, L., Zhao, J., Hu, Y., Zhang, L., Fan, G., Xu, J., Gu, X.,  
327 Cheng, Z., Yu, T., Xia, J., Wei, Y., Wu, W., Xie, X., Yin, W., Li, H., Liu, M., Xiao,  
328 Y., Gao, H., Guo, L., Xie, J., Wang, G., Jiang, R., Gao, Z., Jin, Q., Wang, J., Cao, B.,  
329 2020. Clinical features of patients infected with 2019 novel coronavirus in Wuhan,  
330 China. *The Lancet* 395, 497–506. [https://doi.org/10.1016/S0140-6736\(20\)30183-5](https://doi.org/10.1016/S0140-6736(20)30183-5)
- 331 Jaiswal, R.K., Lohani, A.K., Tiwari, H.L., 2015. Statistical Analysis for Change Detection  
332 and Trend Assessment in Climatological Parameters. *Environ. Process.* 2, 729–749.  
333 <https://doi.org/10.1007/s40710-015-0105-3>

- 334 Jamil, T., Alam, I.S., Gojobori, T., Duarte, C., 2020. No Evidence for Temperature-  
335 Dependence of the COVID-19 Epidemic. medRxiv 2020.03.29.20046706.  
336 <https://doi.org/10.1101/2020.03.29.20046706>
- 337 Jebur, M.N., Pradhan, B., Tehrany, M.S., 2014. Manifestation of LiDAR-Derived Parameters  
338 in the Spatial Prediction of Landslides Using Novel Ensemble Evidential Belief  
339 Functions and Support Vector Machine Models in GIS. IEEE J. Sel. Top. Appl. Earth  
340 Observations Remote Sensing 8, 674–690.  
341 <https://doi.org/10.1109/JSTARS.2014.2341276>
- 342 Kang, D., Choi, H., Kim, J.-H., Choi, J., 2020. Spatial epidemic dynamics of the COVID-19  
343 outbreak in China. International Journal of Infectious Diseases 94, 96–102.  
344 <https://doi.org/10.1016/j.ijid.2020.03.076>
- 345 Kendall, M.G., 1975. Rank Correlation Methods. London, UK.
- 346 Koo, J.R., Cook, A.R., Park, M., Sun, Y., Sun, H., Lim, J.T., Tam, C., Dickens, B.L., 2020.  
347 Interventions to mitigate early spread of SARS-CoV-2 in Singapore: a modelling  
348 study. The Lancet Infectious Diseases 20, 678–688. [https://doi.org/10.1016/S1473-](https://doi.org/10.1016/S1473-3099(20)30162-6)  
349 [3099\(20\)30162-6](https://doi.org/10.1016/S1473-3099(20)30162-6)
- 350 Lemaitre, J., Pasetto, D., Perez-Saez, J., Sciarra, C., Wamala, J.F., Rinaldo, A., 2019. Rainfall  
351 as a driver of epidemic cholera: Comparative model assessments of the effect of intra-  
352 seasonal precipitation events. Acta Tropica 190, 235–243.  
353 <https://doi.org/10.1016/j.actatropica.2018.11.013>
- 354 Leung, K., Wu, J.T., Liu, D., Leung, G.M., 2020. First-wave COVID-19 transmissibility and  
355 severity in China outside Hubei after control measures, and second-wave scenario  
356 planning: a modelling impact assessment. The Lancet 395, 1382–1393.  
357 [https://doi.org/10.1016/S0140-6736\(20\)30746-7](https://doi.org/10.1016/S0140-6736(20)30746-7)

- 358 Liu, J., Zhou, J., Yao, J., Zhang, X., Li, L., Xu, X., He, X., Wang, B., Fu, S., Niu, T., Yan, J.,  
359 Shi, Y., Ren, X., Niu, J., Zhu, W., Li, S., Luo, B., Zhang, K., 2020. Impact of  
360 meteorological factors on the COVID-19 transmission: A multi-city study in China.  
361 *Science of The Total Environment* 726, 138513.  
362 <https://doi.org/10.1016/j.scitotenv.2020.138513>
- 363 Ma, Y., Zhao, Y., Liu, J., He, X., Wang, B., Fu, S., Yan, J., Niu, J., Zhou, J., Luo, B., 2020.  
364 Effects of temperature variation and humidity on the death of COVID-19 in Wuhan,  
365 China. *Science of The Total Environment* 724, 138226.  
366 <https://doi.org/10.1016/j.scitotenv.2020.138226>
- 367 Mallakpour, I., Villarini, G., 2016. A simulation study to examine the sensitivity of the Pettitt  
368 test to detect abrupt changes in mean. *Hydrological Sciences Journal* 61, 245–254.  
369 <https://doi.org/10.1080/02626667.2015.1008482>
- 370 Mann, H.B., 1945. Nonparametric Tests Against Trend. *Econometrica* 13, 245.  
371 <https://doi.org/10.2307/1907187>
- 372 Marjanović, M., Kovačević, M., Bajat, B., Voženílek, V., 2011. Landslide susceptibility  
373 assessment using SVM machine learning algorithm. *Engineering Geology* 123, 225–  
374 234. <https://doi.org/10.1016/j.enggeo.2011.09.006>
- 375 McBryde, E.S., Gibson, G., Pettitt, A.N., Zhang, Y., Zhao, B., McElwain, D.L.S., 2006.  
376 Bayesian modelling of an epidemic of severe acute respiratory syndrome. *Bull. Math.*  
377 *Biol.* 68, 889–917. <https://doi.org/10.1007/s11538-005-9005-4>
- 378 Mollalo, A., Vahedi, B., Rivera, K.M., 2020. GIS-based spatial modeling of COVID-19  
379 incidence rate in the continental United States. *Science of The Total Environment*  
380 728, 138884. <https://doi.org/10.1016/j.scitotenv.2020.138884>
- 381 Novel Coronavirus(2019-nCoV) Situation Report - 7, 2020. . World Health Organization.



- 382 Oliveiros, B., Caramelo, L., Ferreira, N.C., Caramelo, F., 2020. Role of temperature and  
383 humidity in the modulation of the doubling time of COVID-19 cases. medRxiv  
384 2020.03.05.20031872. <https://doi.org/10.1101/2020.03.05.20031872>
- 385 Perlman, S., 2020. Another Decade, Another Coronavirus. *New England Journal of Medicine*  
386 382, 760–762. <https://doi.org/10.1056/NEJMe2001126>
- 387 Pettitt, A.N., 1979. A Non-Parametric Approach to the Change-Point Problem. *Applied*  
388 *Statistics* 28, 126. <https://doi.org/10.2307/2346729>
- 389 Pradhan, B., 2013. A comparative study on the predictive ability of the decision tree, support  
390 vector machine and neuro-fuzzy models in landslide susceptibility mapping using  
391 GIS. *Computers & Geosciences* 51, 350–365.  
392 <https://doi.org/10.1016/j.cageo.2012.08.023>
- 393 Qi, H., Xiao, S., Shi, R., Ward, M.P., Chen, Y., Tu, W., Su, Q., Wang, W., Wang, X., Zhang,  
394 Z., 2020. COVID-19 transmission in Mainland China is associated with temperature  
395 and humidity: A time-series analysis. *Science of The Total Environment* 728, 138778.  
396 <https://doi.org/10.1016/j.scitotenv.2020.138778>
- 397 Rocklöv, J., Sjödin, H., 2020. High population densities catalyse the spread of COVID-19. *J*  
398 *Travel Med* 27. <https://doi.org/10.1093/jtm/taaa038>
- 399 Sen, P.K., 1968. Estimates of the Regression Coefficient Based on Kendall's Tau. *Journal of*  
400 *the American Statistical Association* 63, 1379–1389.  
401 <https://doi.org/10.1080/01621459.1968.10480934>
- 402 Shi, P., Dong, Y., Yan, H., Zhao, C., Li, X., Liu, W., He, M., Tang, S., Xi, S., 2020. Impact  
403 of temperature on the dynamics of the COVID-19 outbreak in China. *Science of The*  
404 *Total Environment* 728, 138890. <https://doi.org/10.1016/j.scitotenv.2020.138890>

- 405 Song, S., Zhan, Z., Long, Z., Zhang, J., Yao, L., 2011. Comparative study of SVM methods  
406 combined with voxel selection for object category classification on fMRI data. PLoS  
407 ONE 6, e17191. <https://doi.org/10.1371/journal.pone.0017191>
- 408 Sooryanarain, H., Elankumaran, S., 2015. Environmental Role in Influenza Virus Outbreaks.  
409 Annual Review of Animal Biosciences 3, 347–373. <https://doi.org/10.1146/annurev-animal-022114-111017>
- 411 Tamerius, J.D., Shaman, J., Alonso, W.J., Bloom-Feshbach, K., Uejio, C.K., Comrie, A.,  
412 Viboud, C., 2013. Environmental Predictors of Seasonal Influenza Epidemics across  
413 Temperate and Tropical Climates. PLOS Pathogens 9, e1003194.  
414 <https://doi.org/10.1371/journal.ppat.1003194>
- 415 Tan, J., Mu, L., Huang, J., Yu, S., Chen, B., Yin, J., 2005. An initial investigation of the  
416 association between the SARS outbreak and weather: with the view of the  
417 environmental temperature and its variation. J Epidemiol Community Health 59, 186–  
418 192. <https://doi.org/10.1136/jech.2004.020180>
- 419 Tehrany, M.S., Pradhan, B., Jebur, M.N., 2014. Flood susceptibility mapping using a novel  
420 ensemble weights-of-evidence and support vector machine models in GIS. Journal of  
421 Hydrology 512, 332–343. <https://doi.org/10.1016/j.jhydrol.2014.03.008>
- 422 Tehrany, M.S., Pradhan, B., Mansor, S., Ahmad, N., 2015. Flood susceptibility assessment  
423 using GIS-based support vector machine model with different kernel types. CATENA  
424 125, 91–101. <https://doi.org/10.1016/j.catena.2014.10.017>
- 425 Tien Bui, D., Pradhan, B., Lofman, O., Revhaug, I., 2012. Landslide Susceptibility  
426 Assessment in Vietnam Using Support Vector Machines, Decision Tree, and Naïve  
427 Bayes Models [WWW Document]. Mathematical Problems in Engineering.  
428 <https://doi.org/10.1155/2012/974638>

- 429 Tosepu, R., Gunawan, J., Effendy, D.S., Ahmad, L.O.A.I., Lestari, H., Bahar, H., Asfian, P.,  
430 2020. Correlation between weather and Covid-19 pandemic in Jakarta, Indonesia.  
431 *Science of The Total Environment* 725, 138436.  
432 <https://doi.org/10.1016/j.scitotenv.2020.138436>
- 433 Unkel, S., Farrington, C.P., Garthwaite, P.H., Robertson, C., Andrews, N., 2012. Statistical  
434 methods for the prospective detection of infectious disease outbreaks: a review.  
435 *Journal of the Royal Statistical Society. Series A (Statistics in Society)* 175, 49–82.
- 436 Wang, C., Horby, P.W., Hayden, F.G., Gao, G.F., 2020a. A novel coronavirus outbreak of  
437 global health concern. *The Lancet* 395, 470–473. [https://doi.org/10.1016/S0140-](https://doi.org/10.1016/S0140-6736(20)30185-9)  
438 [6736\(20\)30185-9](https://doi.org/10.1016/S0140-6736(20)30185-9)
- 439 Wang, M., Jiang, A., Gong, L., Luo, L., Guo, W., Li, Chuyi, Zheng, J., Li, Chaoyong, Yang,  
440 B., Zeng, J., Chen, Y., Zheng, K., Li, H., 2020b. Temperature significant change  
441 COVID-19 Transmission in 429 cities. *medRxiv* 2020.02.22.20025791.  
442 <https://doi.org/10.1101/2020.02.22.20025791>
- 443 Wang, Y., Wang, Yuyi, Chen, Y., Qin, Q., 2020c. Unique epidemiological and clinical  
444 features of the emerging 2019 novel coronavirus pneumonia (COVID-19) implicate  
445 special control measures. *Journal of Medical Virology* 92, 568–576.  
446 <https://doi.org/10.1002/jmv.25748>
- 447 Wijngaard, J.B., Tank, A.M.G.K., Können, G.P., 2003. Homogeneity of 20th century  
448 European daily temperature and precipitation series. *International Journal of*  
449 *Climatology* 23, 679–692. <https://doi.org/10.1002/joc.906>
- 450 Wu, Z., McGoogan, J.M., 2020. Characteristics of and Important Lessons From the  
451 Coronavirus Disease 2019 (COVID-19) Outbreak in China: Summary of a Report of  
452 72 314 Cases From the Chinese Center for Disease Control and Prevention. *JAMA*  
453 323, 1239. <https://doi.org/10.1001/jama.2020.2648>

- 454 Wurtzer, S., Marechal, V., Mouchel, J.-M., Maday, Y., Teyssou, R., Richard, E., Almayrac,  
455 J.L., Moulin, L., 2020. Evaluation of lockdown impact on SARS-CoV-2 dynamics  
456 through viral genome quantification in Paris wastewaters. medRxiv  
457 2020.04.12.20062679. <https://doi.org/10.1101/2020.04.12.20062679>
- 458 Xie, J., Zhu, Y., 2020. Association between ambient temperature and COVID-19 infection in  
459 122 cities from China. *Science of The Total Environment* 724, 138201.  
460 <https://doi.org/10.1016/j.scitotenv.2020.138201>
- 461 Yao, X., Tham, L.G., Dai, F.C., 2008. Landslide susceptibility mapping based on Support  
462 Vector Machine: A case study on natural slopes of Hong Kong, China.  
463 *Geomorphology* 101, 572–582. <https://doi.org/10.1016/j.geomorph.2008.02.011>
- 464 Yuan, J., Yun, H., Lan, W., Wang, W., Sullivan, S.G., Jia, S., Bittles, A.H., 2006. A  
465 climatologic investigation of the SARS-CoV outbreak in Beijing, China. *Am J Infect  
466 Control* 34, 234–236. <https://doi.org/10.1016/j.ajic.2005.12.006>
- 467 Zhu, N., Zhang, D., Wang, W., Li, X., Yang, B., Song, J., Zhao, X., Huang, B., Shi, W., Lu,  
468 R., Niu, P., Zhan, F., Ma, X., Wang, D., Xu, W., Wu, G., Gao, G.F., Tan, W., 2020. A  
469 Novel Coronavirus from Patients with Pneumonia in China, 2019. *N Engl J Med* 382,  
470 727–733. <https://doi.org/10.1056/NEJMoa2001017>
- 471 Zu, Z.Y., Jiang, M.D., Xu, P.P., Chen, W., Ni, Q.Q., Lu, G.M., Zhang, L.J., 2020.  
472 Coronavirus Disease 2019 (COVID-19): A Perspective from China. *Radiology*  
473 200490. <https://doi.org/10.1148/radiol.2020200490>
- 474
- 475
- 476
- 477

478

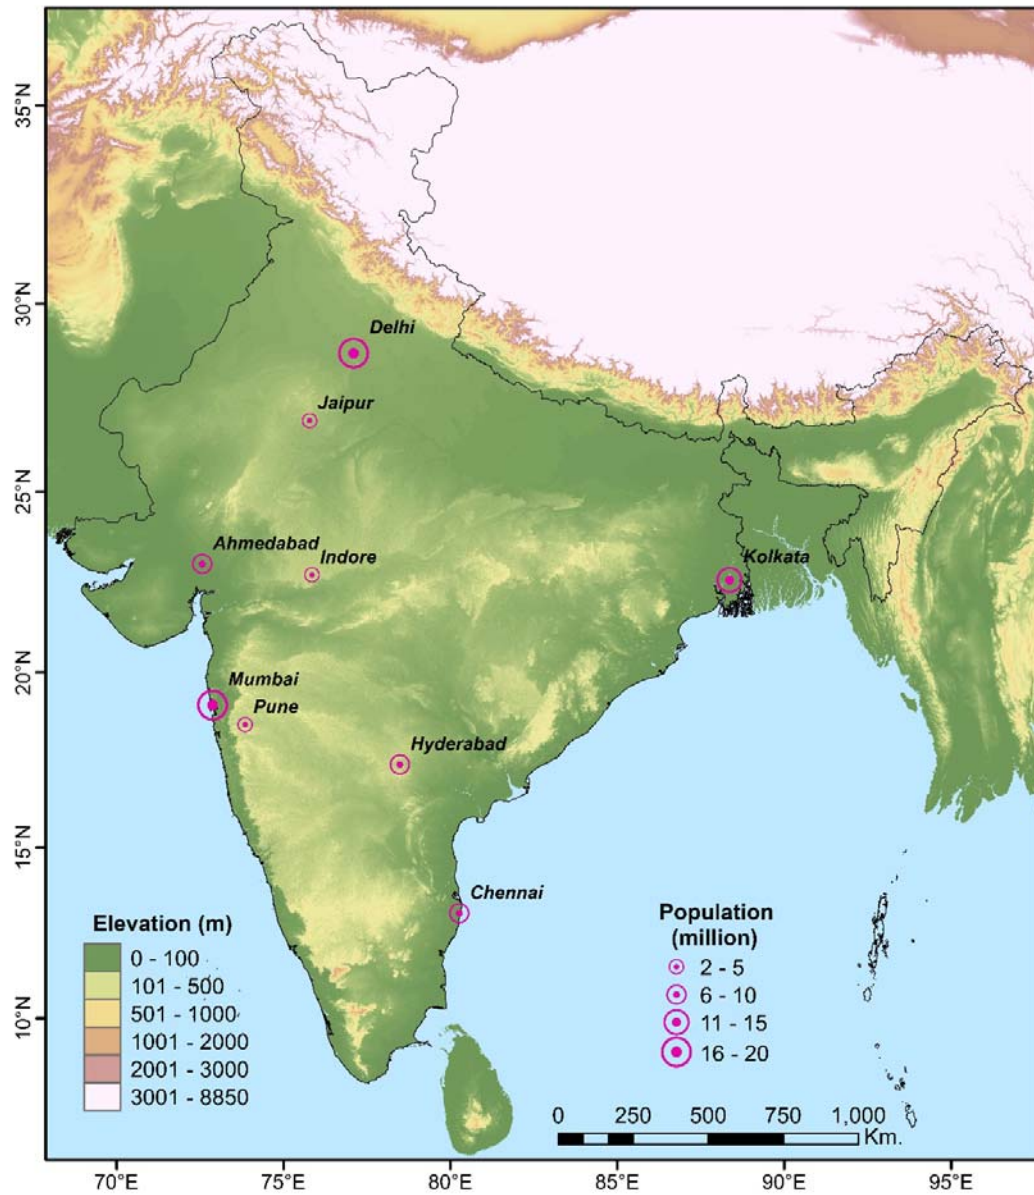

479

480 Fig. 1 Location of the selected cities in India along with the total population of those cities.

481

482

483

484

485

486

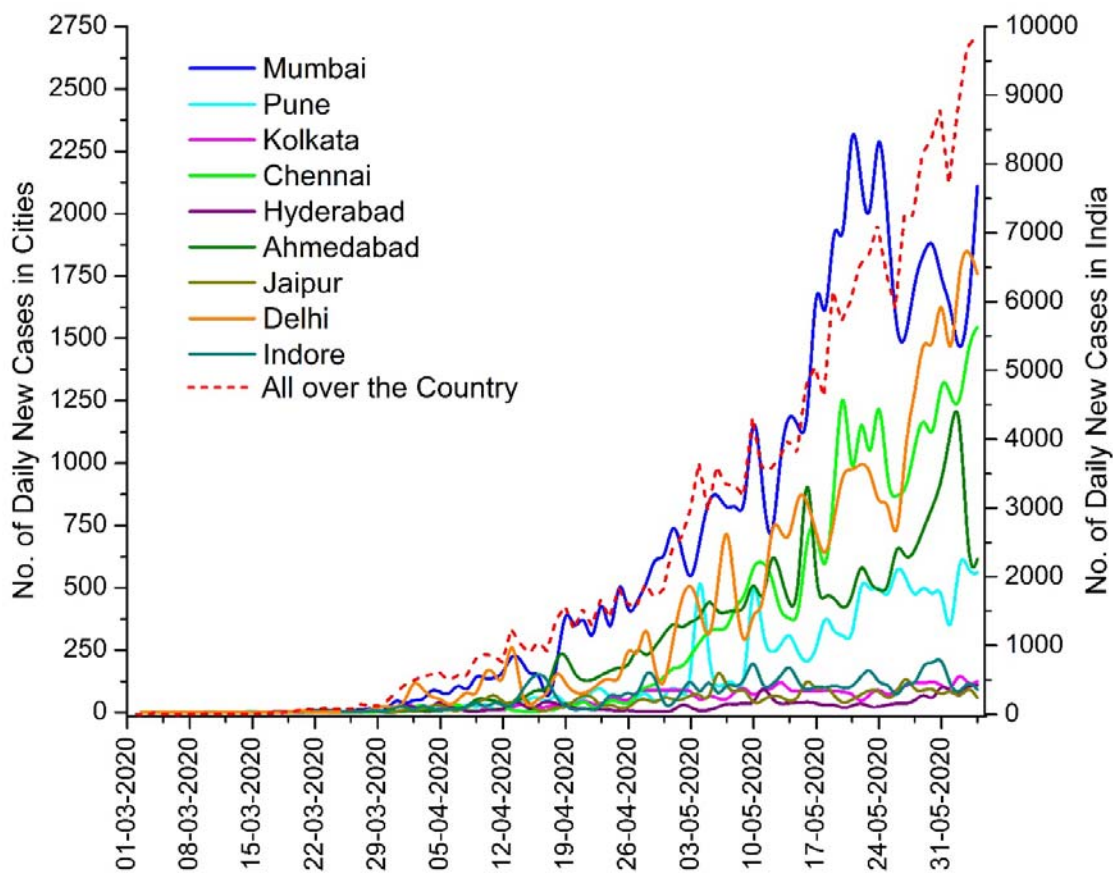

487

488 Fig. 2 Trend of daily confirmed cases over selected cities and all-over the country.

489

490



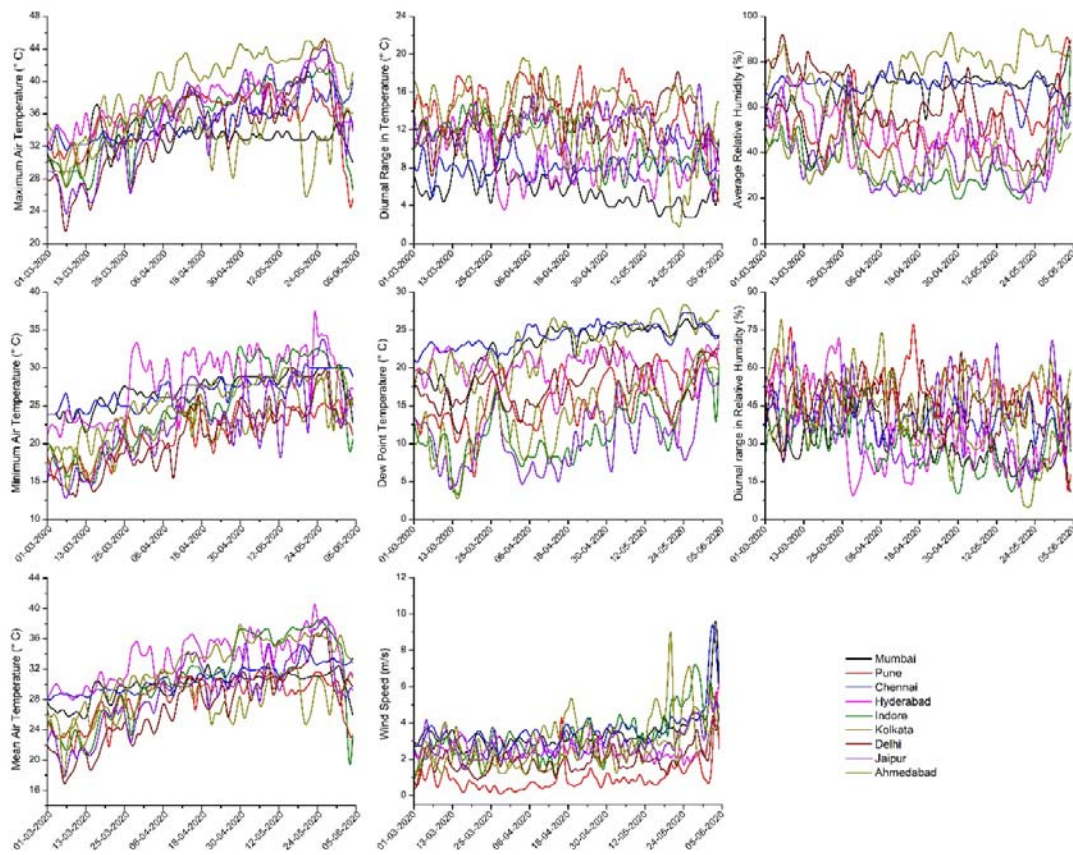

491

492 Fig. 3 Pattern of Daily Weather over the selected cities in India.

493

494

495

496

497

498

499

500

501

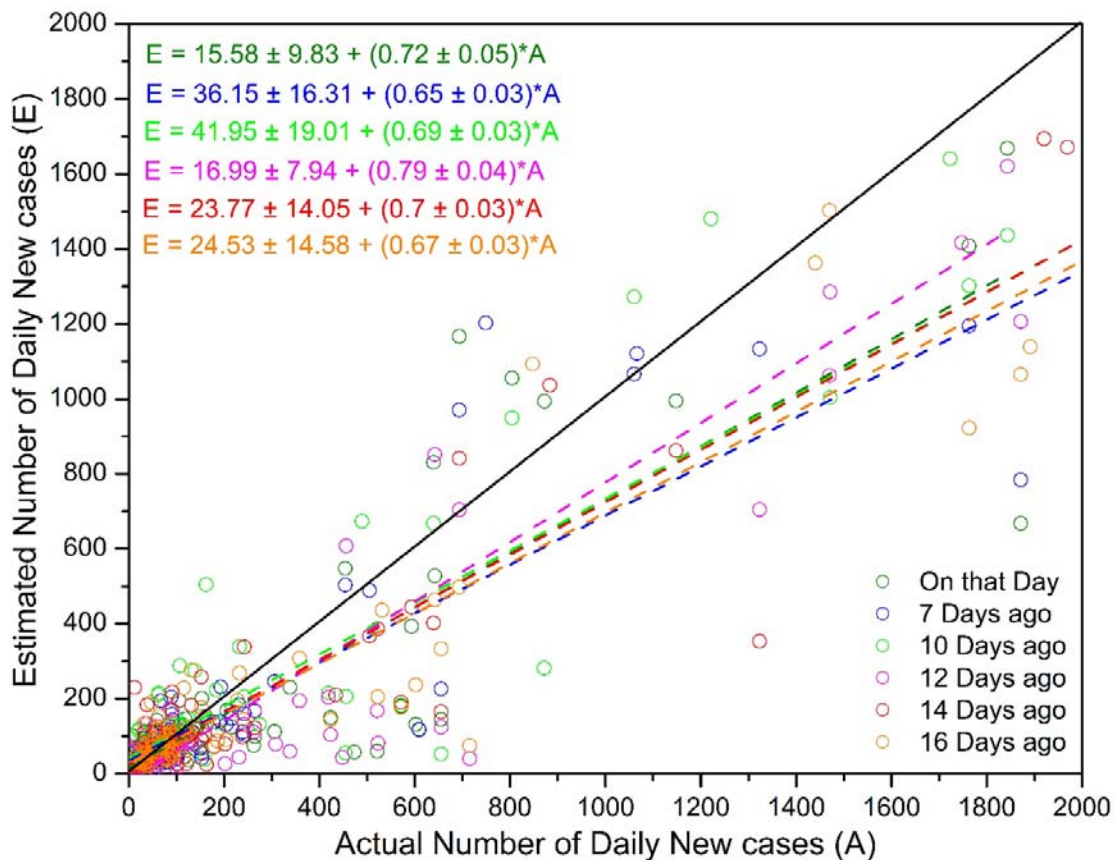

502

503 Fig. 4 Validation of SVM based regression model for estimating daily transmission.

504

505

506

507

508

509

510



511

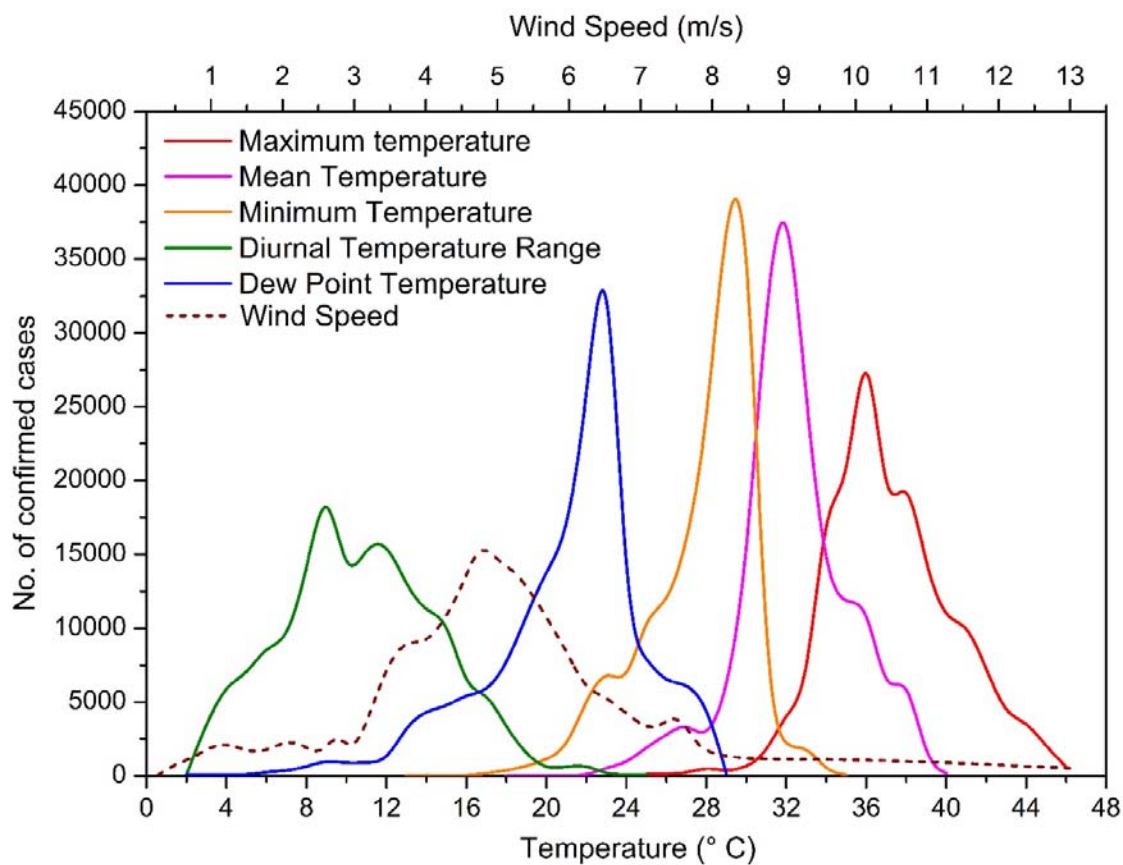

512

513 Fig. 5 Influence of weather parameters on count of confirmed cases with a lag of 12-16 days.

514

515

516

517

518

519

520

521 Table 1 Result of Spearman's correlation test

| Parameters                | On that Day | 7 Days ago | 10 Days ago | 12 Days ago | 14 Days ago | 16 Days ago |
|---------------------------|-------------|------------|-------------|-------------|-------------|-------------|
| Maximum Temperature       | 0.161*      | 0.198*     | 0.231*      | 0.336*      | 0.347*      | 0.272*      |
| Minimum Temperature       | 0.244*      | 0.285*     | 0.319*      | 0.417*      | 0.436*      | 0.351*      |
| Mean Temperature          | 0.199*      | 0.248*     | 0.287*      | 0.409*      | 0.430*      | 0.337*      |
| Temperature Range         | -0.032      | -0.043     | -0.066      | -0.064      | -0.075      | -0.054      |
| Dew Point Temperature     | 0.222*      | 0.235*     | 0.261*      | 0.238*      | 0.269*      | 0.238*      |
| Average Relative Humidity | 0.128*      | 0.1*       | 0.09*       | 0.002       | 0.008       | 0.034       |
| Humidity Range            | -0.016      | -0.024     | -0.056      | -0.13*      | -0.149*     | -0.095*     |
| Wind Speed                | 0.108*      | 0.133*     | 0.163*      | 0.221*      | 0.255*      | 0.193*      |

522 \*Significant at 0.05 significance level.

523

524 Table 2 Result of Validation of SVM based regression for estimating daily transmission.

|             | R <sup>2</sup> | RMSE     | MB       |
|-------------|----------------|----------|----------|
| On that Day | 0.6414         | 199.2929 | -48.1804 |
| 7 Days ago  | 0.7015         | 202.1743 | -40.0377 |
| 10 Days ago | 0.8286         | 223.1949 | -42.0560 |
| 12 Days ago | 0.8503         | 186.0126 | -66.9880 |
| 14 Days ago | 0.8680         | 178.3891 | -43.6459 |
| 16 Days ago | 0.8714         | 202.2428 | -60.0658 |

525
